# Supplementary material for: Facile synthesis of mesoporous aluminosilicate nanoparticles for the selective production of N-benzylidenaniline in a solvent-free reaction of aniline with benzyl alcohol
Source: Royal Society of Chemistry journal article supplement (doi:10.1039/c3ta15323a), 2014-01-01
Supplement: c3ta15323a1.pdf [file c3ta15323a1.pdf]

## Facile synthesis of mesoporous aluminosilicate nano particles for selective production of N-Benzylidenaniline in solvent-free reaction of aniline with benzyl alcohol<sup>†</sup>

Peta sreenivasulu, Nagabhatla Viswanadham\* and Sandeep K Saxena

*Catalysis and Conversion Processes Division, CSIR-Indian Institute of Petroleum, Dehradun-248005, India, Fax: 91-135-2525702, Tel: 91-135-2525856, E-mail: [nvish@iip.res.in](mailto:nvish@iip.res.in)*

**Supporting Figure 1: EDX spectra of the AlSi-T and AlSi-HT**

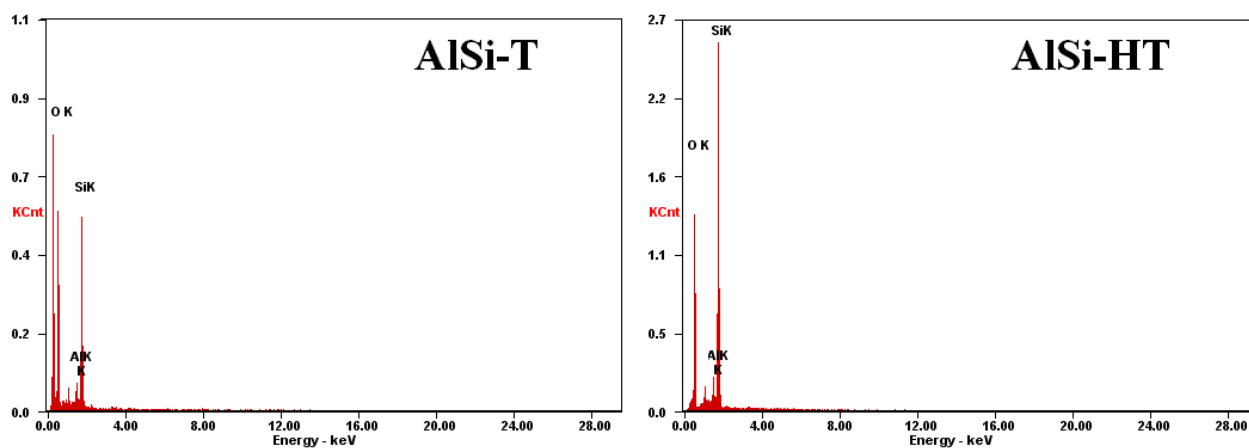

**Supporting Figure 2: SEM images and EDX elemental mapping of the AlSi-T and AlSi-HT samples.**

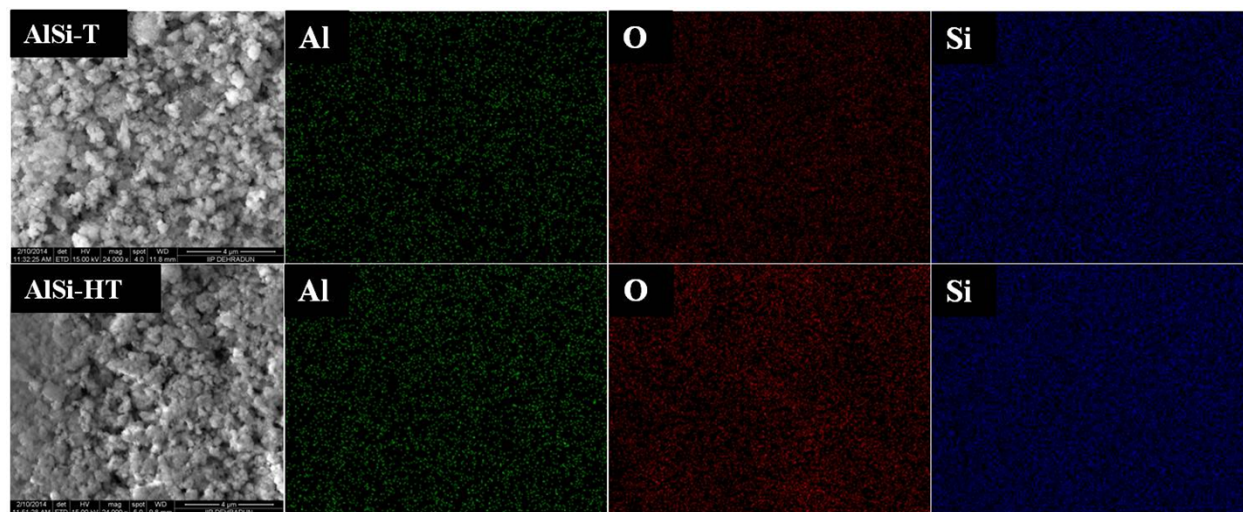

**Supporting figure 3:** Wide angle XRD spectra of the AlSi-T and AlSi-HT

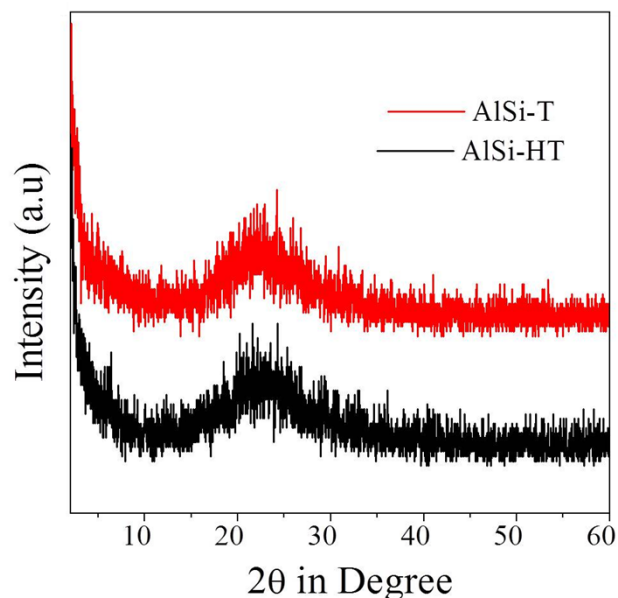

**Table S1:** Performance comparison of AlSi-T and AlSi-HT catalysts (with those reported in literature) towards N-alkylation of aniline for selective production of imine

| Support                                                                     | Precious metal load | Time (h) | Aniline : Benzyl Alcohol (mole:mole) | Aniline Conversion (%) | N-benzylideneaniline (imine) Selectivity (%) | Ref.          |
|-----------------------------------------------------------------------------|---------------------|----------|--------------------------------------|------------------------|----------------------------------------------|---------------|
| <sup>a</sup> TiO <sub>2</sub>                                               | (0.5%)Pt            | 12       | 1:1000                               | 54                     | 88                                           | S1            |
| <sup>a</sup> TiO <sub>2</sub>                                               | (1.0%) Pt           | 12       | 1:1000                               | 42                     | 86                                           | S1            |
| <sup>a</sup> Pt@TiO <sub>2</sub>                                            | (0.3%)Pt            | 12       | 1:1000                               | 99                     | 98                                           | S1            |
| <sup>b</sup> Al <sub>2</sub> O <sub>3</sub> -Ga <sub>2</sub> O <sub>3</sub> | Ag                  | 26       | 1:2                                  | 89                     | 3                                            | S2            |
| AlSi-T                                                                      | .....               | 4        | 1:5                                  | 40                     | 100                                          | Present study |
| AlSi-HT                                                                     | .....               | 4        | 1:5                                  | 42                     | 100                                          | Present study |

<sup>a</sup>N<sub>2</sub>, 1 atm; temperature, 25°C; photoirradiation time, 12 h; Catalyst, 0.005g. <sup>b</sup> NaH, toluene, 26 h, temperature, 110°C; Ar; 3% mole catalyst. <sup>c</sup>Temperature, 100°C; Reaction time, 4h; Pressure, atmospheric; Catalyst, 0.25g.

S1. Y. Shiraishi, M. Ikeda, D. Tsukamoto, S. Tanaka and T. Hirai, *Chem. Commun.*, 2011, **47**, 4811

S2. I. Geukens, F. Vermoortele, M. Meledina, S Turner, G. V. Tendeloo, D. E. D. Vos, *Applied Catalysis A: General*, 2014, 469, 373.

**Table S2:** Reusability studies of AlSi-T catalyst in N-Alkylation of aniline

| <b>Reaction cycles</b> | <b>Reaction time (h)</b> | <b>Conversion (%)</b> | <b>N-benzylidenaniline (imine) Selectivity (%)</b> |
|------------------------|--------------------------|-----------------------|----------------------------------------------------|
| 1                      | 4                        | 40                    | 100                                                |
| 2                      | 4                        | 38                    | 100                                                |
| 3                      | 4                        | 35                    | 100                                                |

**Table S3:** Reusability studies of AlSi-HT catalyst in N-Alkylation of aniline

| <b>Reaction cycles</b> | <b>Reaction time (h)</b> | <b>Conversion (%)</b> | <b>N-benzylidenaniline (imine) Selectivity (%)</b> |
|------------------------|--------------------------|-----------------------|----------------------------------------------------|
| 1                      | 4                        | 45                    | 100                                                |
| 2                      | 4                        | 44                    | 100                                                |
| 3                      | 4                        | 42                    | 100                                                |
